# Supplementary material for: Meta-analysis of genome-wide association studies identifies common susceptibility polymorphisms for colorectal and endometrial cancer near SH2B3 and TSHZ1
Source: PubMed Central journal article supplement (PMC4664893; doi:10.1038/srep17369), 2015-12-01
Supplement: srep17369-s1.pdf [file srep17369-s1.pdf]

## Supplementary Information

### Meta-analysis of genome-wide association studies identifies common susceptibility polymorphisms for colorectal and endometrial cancer near *SH2B3* and *TSHZ1*

Timothy HT Cheng<sup>1</sup>, Deborah Thompson<sup>2</sup>, Jodie Painter<sup>3</sup>, Tracy O'Mara<sup>3</sup>, Maggie Gorman<sup>1</sup>, Lynn Martin<sup>1</sup>, Claire Palles<sup>1</sup>, Angela Jones<sup>1</sup>, Daniel D. Buchanan<sup>4,5</sup>, Aung Ko Win<sup>5</sup>, John Hopper<sup>5</sup>, Mark Jenkins<sup>5</sup>, Noralane M. Lindor<sup>6</sup>, Polly A. Newcomb<sup>7</sup>, Steve Gallinger<sup>8</sup>, David Conti<sup>9</sup>, Fred Schumacher<sup>9</sup>, Graham Casey<sup>9</sup>, Graham G Giles<sup>5,10,11</sup>, Paul Pharoah<sup>2,12</sup>, Julian Peto<sup>13</sup>, Angela Cox<sup>14</sup>, Anthony Swerdlow<sup>15</sup>, Fergus Couch<sup>16,17</sup>, Julie M Cunningham<sup>16</sup>, Ellen L Goode<sup>17</sup>, Stacey J Winham<sup>17</sup>, Diether Lambrechts<sup>18</sup>, Peter Fasching<sup>19,20</sup>, Barbara Burwinkel<sup>21,22</sup>, Hermann Brenner<sup>22,23</sup>, Hiltrud Brauch<sup>22,23</sup>, Jenny Chang-Claude<sup>23</sup>, Helga B. Salvesen<sup>24</sup>, Vessela Kristensen<sup>25</sup>, Hatef Darabi<sup>26</sup>, Jingmei Li<sup>26</sup>, Tao Liu<sup>26</sup>, Annika Lindblom<sup>26</sup>, Per Hall<sup>27</sup>, Magdalena Echeverry de Polanco<sup>28</sup>, Monica Sans<sup>29</sup>, Angel Carracedo<sup>30</sup>, Sergi Castellvi-Bel<sup>31</sup>, Augusto Rojas-Martinez<sup>32</sup>, Samuel Aguiar Jnr<sup>33</sup>, Manuel R. Teixeira<sup>34</sup>, Alison M Dunning<sup>12</sup>, Joe Dennis<sup>2</sup>, Geoffrey Otton<sup>35</sup>, Tony Proietto<sup>35</sup>, Elizabeth Holliday<sup>36</sup>, John Attia<sup>36</sup>, Katie Ashton<sup>36</sup>, Rodney J Scott<sup>36</sup>, Mark McEvoy<sup>37</sup>, Sean C Dowdy<sup>38</sup>, Brooke L Fridley<sup>39</sup>, Henrica MJ Werner<sup>40</sup>, Jone Trovik<sup>40</sup>, Tormund S Njolstad<sup>40</sup>, Emma Tham<sup>26</sup>, Miriam Mints<sup>41</sup>, Ingo Runnebaum<sup>42</sup>, Peter Hillemanns<sup>43</sup>, Thilo Dörk<sup>44</sup>, Frederic Amant<sup>45</sup>, Stefanie Schrauwen<sup>18</sup>, Alexander Hein<sup>20</sup>, Matthias W Beckmann<sup>20</sup>, Arif Ekici<sup>46</sup>, Kamila Czene<sup>27</sup>, Alfons Meindl<sup>47</sup>, Manjeet K Bolla<sup>2</sup>, Kyriaki Michailidou<sup>2</sup>, Jonathan P Tyrer<sup>12</sup>, Qin Wang<sup>2</sup>, Shahana Ahmed<sup>12</sup>, Catherine S Healey<sup>12</sup>, Mitul Shah<sup>12</sup>, Daniela Annibali<sup>48</sup>, Jeroen Depreeuw<sup>48</sup>, Australian Ovarian Cancer Study Group<sup>8</sup>, Nada A. Al-Tassan<sup>50</sup>, Rebecca Harris<sup>51</sup>, Brian F. Meyer<sup>50</sup>, Nicola Whiffin<sup>52</sup>, Fay J Hosking<sup>52</sup>, Ben Kinnersley<sup>52</sup>, Susan M. Farrington<sup>53</sup>, Maria Timofeeva<sup>53</sup>, Albert Tenesa<sup>54</sup>, Harry Campbell<sup>55</sup>, Robert W. Haile<sup>56</sup>, Shirley Hodgson<sup>57</sup>, Luis Carvajal-Carmona<sup>58</sup>, Jeremy P. Cheadle<sup>51</sup>, Douglas Easton<sup>2,12</sup>, Malcolm Dunlop<sup>53</sup>, Richard Houlston<sup>52</sup>, Amanda Spurdle<sup>3</sup>, Ian Tomlinson<sup>1,59</sup>

<sup>1</sup> Molecular and Population Genetics Laboratory, Wellcome Trust Centre for Human Genetics, University of Oxford, Roosevelt Drive, Oxford OX3 7BN, UK

<sup>2</sup> Centre for Cancer Genetic Epidemiology, Public Health and Primary Care, University of Cambridge, Cambridge CBI 8RN, UK

<sup>3</sup> The Molecular Cancer Epidemiology Laboratory, QIMR Berghofer Medical Research Institute, Brisbane 4006, Australia

<sup>4</sup> Oncogenomics Group, Genetic Epidemiology Laboratory, Department of Pathology, The University of Melbourne, Victoria, Australia

<sup>5</sup> Centre for Epidemiology and Biostatistics, The University of Melbourne, Victoria, Australia

<sup>6</sup> Department of Health Sciences Research, Mayo Clinic, Scottsdale, AZ, USA

- 7 Cancer Prevention Program, Fred Hutchinson Cancer Research Center, Seattle, WA, USA
- 8 Lunenfeld-Tanenbaum Research Institute, Mount Sinai Hospital, Toronto, ON, Canada
- 9 Department of Preventive Medicine, University of Southern California, Los Angeles, CA, USA
- 10 Cancer Epidemiology Centre, Cancer Council Victoria, Melbourne, Australia
- 11 Department of Epidemiology and Preventive Medicine, Monash University, Melbourne, Australia
- 12 Centre for Cancer Genetic Epidemiology, Department of Oncology, University of Cambridge, Cambridge, UK
- 13 London School of Hygiene and Tropical Medicine, London, UK
- 14 Sheffield Cancer Research Centre, Department of Oncology, University of Sheffield, Sheffield, UK
- 15 Division of Genetics and Epidemiology, Institute of Cancer Research, Sutton, UK and I7 Division of Breast Cancer Research, Institute of Cancer Research, London, UK
- 16 Department of Laboratory Medicine and Pathology, Mayo Clinic, Rochester, MN, USA
- 17 Department of Health Sciences Research, Mayo Clinic, Rochester, MN, USA.
- 18 Department of Oncology, KU Leuven, Belgium
- 19 University of California at Los Angeles, Department of Medicine, Division of Hematology/Oncology, David Geffen School of Medicine, Los Angeles, CA, USA
- 20 Department of Gynecology and Obstetrics, University Hospital Erlangen, Friedrich-Alexander University Erlangen-Nuremberg, Erlangen, Germany
- 21 Division of Cancer Epidemiology, German Cancer Research Center, Heidelberg, Germany
- 22 Dr. Margarete Fischer-Bosch-Institute of Clinical Pharmacology Stuttgart, University of Tuebingen, Germany
- 23 Division of Cancer Epidemiology, German Cancer Research Center, Heidelberg, Germany
- 24 Department of Clinical Science, Center for Cancer Biomarkers, University of Bergen, Norway
- 25 Department of Genetics, Institute for Cancer Research, The Norwegian Radium Hospital, Oslo, Norway; The K.G. Jebsen Center for Breast Cancer Research, Institute for Clinical Medicine, Faculty of Medicine, University of Oslo, Oslo, Norway; Department of Clinical Molecular Oncology, Division of Medicine, Akershus University Hospital, Ahus, Norway
- 26 Department of Molecular Medicine and Surgery, Karolinska Institutet, Stockholm, Sweden
- 27 Department of Medical Epidemiology and Biostatistics, Karolinska Institutet, Stockholm, Sweden
- 28 Grupo de investigación Citogenética, Filogenia y Evolución de Poblaciones, Universidad del Tolima, Ibagué, Tolima, Colombia
- 29 Departamento de Antropología Biológica, Facultad de Humanidades, UDELAR, Magallanes 1577, CP 11200, Montevideo, Uruguay
- 30 Universidade de Santiago de Compostela, R/ San Francisco s/n 15782, Santiago de Compostela, Spain

- <sup>31</sup> Genetic Predisposition to Colorectal Cancer Group, Gastrointestinal & Pancreatic Oncology Team, IDIBAPS/CIBERehd/Hospital Clínic, Centre Esther Koplowitz (CEK), Rosselló 153 planta 4, 08036 Barcelona, Spain
- <sup>32</sup> Universidad Autónoma De Nuevo León, Pedro de Alba s/n, San Nicolás de Los Garza, Nuevo León, Mexico
- <sup>33</sup> Hospital A.C. Camargo, São Paulo, Brazil
- <sup>34</sup> Department of Genetics and IPO-Porto Research Center (CI-IPOP), Portuguese Oncology Institute of Porto (IPO-Porto), Porto, Portugal, and Biomedical Sciences Institute (ICBAS), University of Porto, Porto, Portugal
- <sup>35</sup> School of Medicine and Public Health, University of Newcastle, NSW, Australia
- <sup>36</sup> Hunter Medical Research Institute, John Hunter Hospital, Newcastle, NSW, Australia
- <sup>37</sup> Centre for Clinical Epidemiology and Biostatistics, School of Medicine and Public Health, University of Newcastle, NSW, Australia
- <sup>38</sup> Department of Obstetrics and Gynecology, Division of Gynecologic Oncology, Mayo Clinic, Rochester, MN, USA
- <sup>39</sup> Department of Biostatistics, University of Kansas Medical Center, Kansas City, KS, USA
- <sup>40</sup> Centre for Cancer Biomarkers, Department of Clinical Science, The University of Bergen, Norway
- <sup>41</sup> Department of Women's and Children's Health, Karolinska Institutet, Karolinska University Hospital, Stockholm, Sweden
- <sup>42</sup> Department of Gynaecology, Jena University Hospital - Friedrich Schiller University, Jena, Germany
- <sup>43</sup> Hannover Medical School, Clinics of Gynaecology and Obstetrics, Hannover, Germany
- <sup>44</sup> Hannover Medical School, Gynaecology Research Unit, Hannover, Germany
- <sup>45</sup> Division of Gynaecological Oncology, University Hospital Leuven, Leuven, Belgium
- <sup>46</sup> Institute of Human Genetics, University Hospital Erlangen, Friedrich-Alexander University Erlangen-Nuremberg, Erlangen, Germany
- <sup>47</sup> Department of Obstetrics and Gynecology, Division of Tumor Genetics, Technical University of Munich, Munich, Germany
- <sup>48</sup> Department of Obstetrics and Gynecology, Division of Gynecologic Oncology, University Hospitals, KU Leuven, University of Leuven, 3000, Belgium
- <sup>49</sup> Vesalius Research Center, Leuven, 3000, Belgium
- <sup>50</sup> Department of Genetics, King Faisal Specialist Hospital and Research Center, P.O.Box 3354, Riyadh 11211, Saudi Arabia
- <sup>51</sup> Institute of Cancer and Genetics, School of Medicine, Cardiff University, Heath Park, Cardiff, CF14 4XN, UK

<sup>52</sup> Division of Genetics and Epidemiology, The Institute of Cancer Research, Sutton, Surrey SM2 5NG, UK

<sup>53</sup> Colon Cancer Genetics Group, Institute of Genetics and Molecular Medicine, University of Edinburgh and MRC Human Genetics Unit, Western General Hospital Edinburgh, Crewe Road, Edinburgh, EH4 2XU, UK

<sup>54</sup> The Roslin Institute, University of Edinburgh, Easter Bush, Roslin, EH25 9RG, UK

<sup>55</sup> Centre for Population Health Sciences, University of Edinburgh, Edinburgh, EH8 9AG, UK

<sup>56</sup> Stanford Cancer Institute, Lorry Lokey Building/SIM 1, 265 Campus Drive, Ste G2103, Stanford, CA 94305-5456, USA.

<sup>57</sup> Department of Cancer Genetics, St. George's University of London, London SW17 0RE, UK

<sup>58</sup> Genome Center and Department of Biochemistry and Molecular Medicine, School of Medicine, University of California, Davis, USA

<sup>59</sup> Oxford NIHR Comprehensive Biomedical Research Centre, Wellcome Trust Centre for Human Genetics, Roosevelt Drive, Oxford OX3 7BN, UK.

§ A list of participants and their affiliations appears in the Supplementary Information.

+ to whom correspondence should be addressed at Wellcome Trust Centre for Human Genetics, Roosevelt drive, Oxford OX3 7BN, United Kingdom. Email [iant@well.ox.ac.uk](mailto:iant@well.ox.ac.uk)

## Consortium

The Australian Ovarian Cancer Study (AOCS) group.

Management Group: D Bowtell (Peter MacCallum Cancer Centre), G Chenevix-Trench, A Green, P Webb (QIMR), A deFazio (Westmead Institute for Cancer Research, WMI), D Gertig (Victorian Cervical Cytology Registry)

Project Managers: N Traficante, S Fereday, K Alsop (Peter MacCallum Cancer Centre), S Moore (QIMR), J Hung (Westmead Institute for Cancer Research, WMI)

Data Managers: S Fereday (Peter MacCallum Cancer Centre), K Harrap, T Sadkowsky, N Pandeya (QIMR)

Research Nurses and Assistants: ACT- M Malt; NSW- A Mellon, R Robertson (John Hunter Hospital), T Vanden Bergh, M Jones, P Mackenzie (Royal Hospital for Women), J Maidens (Royal North Shore Hospital), K Nattress (Royal Prince Alfred Hospital), YE Chiew, A Stenlake, H Sullivan, (Westmead Hospital); QLD- B Alexander, P Ashover, S Brown, T Corrish, L Green, L Jackman, K Ferguson, K Martin, A Martyn, B Ranieri (QIMR); SA- J White (Flinders Medical Centre, Royal Adelaide Hospital, Queen Elizabeth); TAS- V Jayde (Royal Hobart Hospital); VIC- L Bowes (Freemasons Hospital, Mercy Hospital for Women, Royal Women's Hospital); P Mammers (Monash Medical Centre); L Galletta, D Giles, J Hendley, K Alsop (Peter MacCallum Cancer Centre); WA- T Schmidt, H Shirley, C Ball, C Young, S Viduka, Hoa Tran, Sanela Bilic, Lydia Glavinas (WARTN), Julia Brooks (St John of God Hospital)

Clinical Collaborators: ACT- R Stuart-Harris (Canberra Hospital); NSW- F Kirsten (Bankstown); J Rutovitz (Hornsby); P Clingan, A Glasgow (Illawarra Area Health Services); A Proietto, S Braye, G Otton (John Hunter Hospital); J Shannon (Nepean Hospital); T Bonaventura, J Stewart (Newcastle Mater Misericordiae); S Begbie (Port Macquarie Base Hospital); M Friedlander (Prince of Wales Hospital); D Bell, S Baron-Hay, A Ferrier (dec.), G Gard, D Nevell, N Pavlakis, S Valmadre, B Young (until mid 2003) (Royal North Shore Hospital); C Camaris, R Crouch, L Edwards, N Hacker, D Marsden, G Robertson (Royal Hospital for Women); P Beale, J Beith, J Carter, C Dalrymple, R Houghton, P Russell, L Anderson (Royal Prince Alfred Hospital); M Links (St George Hospital); J Grygiel (St Vincent's Hospital); J Hill (Wagga Wagga Base Hospital); A Brand, K Byth, R Jaworski, P Harnett, R Sharma, G Wain (Westmead Hospital); QLD- B Ward, D Papadimos (Mater Misericordiae Hospitals); A Crandon, M Cummings, K Horwood, A Obermair, L Perrin, D Wyld (Royal Women's Hospital); J Nicklin (Royal Women's Hospital and Wesley Hospital); SA- M Davy, MK Oehler, C Hall, T Dodd, T Healy, K Pittman (Royal Adelaide Hospital, Burnside Memorial Hospital); D Henderson (Flinders Medical Centre); J Miller, J Pierdes (Queen Elizabeth Hospital); A Achan (ICPMR); TAS- P Blomfield, D Challis, R McIntosh, A Parker (Royal Hobart Hospital); VIC- B Brown, R Rome (Freemasons Hospital); D Allen, P Grant, S Hyde, R Laurie M Robbie, (Mercy

Hospital for Women), D Healy, T Jobling, T Manolitsas, J McNealage, P Rogers, B Susil, E Sumithran, I Simpson, (Monash Medical Centre); K Phillips, D Rischin, S Fox, D Johnson, P Waring, S Lade, M Loughrey, N O'Callaghan, W Murray, L Mileshekin, P Allan (Peter MacCallum Cancer Centre); V Billson, J Pyman, D Neesham, M Quinn, A Hamilton, O McNally (Royal Women's Hospital); C Underhill (Border Medical Oncology); Prof R Bell (Andrew Love Cancer Centre); LF Ng (Ballarat Base Hospital); R Blum (Bendigo Health Care Group); V Ganju (Peninsula Health); WA- I Hammond, Y Leung (School for Women's and Infants' Health, University of Western Australia and the Western Australian Gynaecologic Cancer Service); A McCartney (dec.), C Stewart (King Edward Memorial Hospital); M Buck (Mount Hospital)

Scientific Collaborators: I Haviv (Peter MacCallum Cancer Centre); D Purdie, D Whiteman (QIMR); N Zeps (WARTN)

Scientific Advisory Board: P Gurry, A Hamilton, S Hankinson, P Meltzer

## SUPPLEMENTARY DATA

### Supplementary Information. Primary data sources for the 29 previously-reported CRC and EC SNPs.

- Broderick et al. A genome-wide association study shows that common alleles of SMAD7 influence colorectal cancer risk. *Nat Genet.* 2007;39:1315–1317.
- Dunlop et al. Common variation near CDKN1A, POLD3 and SHROOM2 influences colorectal cancer risk. *Nat Genet.* 2012 May 27;44(7):770-6.
- Houlston et al. Meta-analysis of genome-wide association data identifies four new susceptibility loci for colorectal cancer. *Nat Genet.* 2008 Dec;40(12):1426-35.
- Houlston et al. Meta-analysis of three genome-wide association studies identifies susceptibility loci for colorectal cancer at 1q41, 3q26.2, 12q13.13 and 20q13.33. *Nat Genet.* 2010 Nov;42(11):973-7.
- Jia et al. Genome-wide association analyses in east Asians identify new susceptibility loci for colorectal cancer. *Nature Genetics* 45, 191–196 (2013)
- Kinnersley et al. The TERT variant rs2736100 is associated with colorectal cancer risk. *Br J Cancer.* 2012 Sep 4;107(6):1001-8.
- Peters et al. Identification of genetic susceptibility loci for colorectal tumors in a genome-wide meta-analysis. *Gastroenterology.* 2013 Apr;144(4):799-807.e24.
- Peters et al. Meta-analysis of new genome-wide association studies of colorectal cancer risk. *Hum Genet.* 2012 Feb;131(2):217-34.
- Rafnar et al. Sequence variants at the TERT-CLPTMIL locus associate with many cancer types. *Nat Genet.* 2009 Feb;41(2):221-7.
- Setiawan et al. Two estrogen-related variants in CYP19A1 and endometrial cancer risk: a pooled analysis in the Epidemiology of Endometrial Cancer Consortium. 2009 Jan;18(1):242-7.
- Spurdle et al. Genome-wide association study identifies a common variant associated with risk of endometrial cancer. *Nat Genet.* 2011 May;43(5):451-4.
- Tenesa et al. Genome-wide association scan identifies a colorectal cancer susceptibility locus on 11q23 and replicates risk loci at 8q24 and 18q21. *Nat Genet.* 2008 May;40(5):631-7.
- Tomlinson et al. A genome-wide association scan of tag SNPs identifies a susceptibility variant for colorectal cancer at 8q24.21. *Nat Genet.* 2007 Aug;39(8):984-8.
- Tomlinson et al. A genome-wide association study identifies colorectal cancer susceptibility loci on chromosomes 10p14 and 8q23.3. *Nat Genet.* 2008;40:623–630.
- Tomlinson et al. Multiple common susceptibility variants near BMP pathway loci GREM1, BMP4, and BMP2 explain part of the missing heritability of colorectal cancer. *PLoS Genet.* 2011 Jun;7(6):e1002105.

Whiffin et al. Identification of susceptibility loci for colorectal cancer in a genome-wide meta-analysis. *Hum Mol Genet.* 2014 Sep 1;23(17):4729-37.

Zhang et al. Large-scale genetic study in East Asians identifies six new loci associated with colorectal cancer risk. *Nature Genetics* 46, 533–542 (2014)



**Supplementary Table 1. Association statistics of SNPs previously undiscovered by GWAS with strongest evidence of effects on combined CRC and EC predisposition.**

| SNP              | Chr       | Position<br>(build<br>37) | Nearby gene  | Reference<br>allele | Allele<br>frequency | OR          | L95         | CI          | U95             | CI          | p-value    | $I^2$ | iCOGS EC<br>samples<br>included? |
|------------------|-----------|---------------------------|--------------|---------------------|---------------------|-------------|-------------|-------------|-----------------|-------------|------------|-------|----------------------------------|
| <b>rs3184504</b> | <b>12</b> | <b>111,884,608</b>        | <b>SH2B3</b> | <b>C</b>            | <b>0.520</b>        | <b>1.10</b> | <b>1.06</b> | <b>1.13</b> | <b>8.23E-09</b> | <b>0.00</b> | <b>Yes</b> |       |                                  |
| rs6051080        | 20        | 25,975,674                | NANP         | A                   | 0.649               | 1.12        | 1.08        | 1.17        | 1.23E-07        | 0.00        | No         |       |                                  |
| rs2052678        | 12        | 29,833,329                | TMTC1        | G                   | 0.861               | 0.86        | 0.81        | 0.91        | 1.38E-07        | 0.31        | No         |       |                                  |
| rs11085466       | 19        | 21,751,811                | ZNF429       | G                   | 0.782               | 1.15        | 1.09        | 1.22        | 1.53E-07        | 0.00        | No         |       |                                  |
| rs17503919       | 6         | 89,565,737                | RNGTT        | A                   | 0.862               | 1.17        | 1.11        | 1.25        | 1.66E-07        | 0.00        | No         |       |                                  |
| rs76225372       | 10        | 19,320,086                | ARL5B        | A                   | 0.912               | 1.21        | 1.13        | 1.31        | 1.68E-07        | 0.00        | No         |       |                                  |
| rs7740797        | 6         | 155,121,259               | SCAF8        | G                   | 0.513               | 1.12        | 1.07        | 1.16        | 2.20E-07        | 0.36        | No         |       |                                  |
| rs3181245        | 6         | 24,651,320                | TDP2         | C                   | 0.514               | 1.12        | 1.07        | 1.16        | 2.23E-07        | 0.45        | No         |       |                                  |
| rs4378954        | 3         | 115,650,448               | LSAMP        | C                   | 0.898               | 1.15        | 1.09        | 1.21        | 4.05E-07        | 0.10        | Yes        |       |                                  |
| rs10457678       | 6         | 139,122,240               | ECT2L        | A                   | 0.773               | 1.10        | 1.06        | 1.14        | 4.12E-07        | 0.00        | Yes        |       |                                  |
| rs17035310       | 4         | 106,064,754               | TET2         | C                   | 0.876               | 1.13        | 1.08        | 1.18        | 6.10E-07        | 0.00        | Yes        |       |                                  |
| rs9901225        | 17        | 40,755,811                | PSMC3IP      | T                   | 0.551               | 1.11        | 1.06        | 1.16        | 1.13E-06        | 0.49        | No         |       |                                  |
| rs1512436        | 11        | 106,306,871               | GUCY1A2      | T                   | 0.553               | 0.93        | 0.90        | 0.95        | 1.22E-06        | 0.00        | Yes        |       |                                  |
| rs10217586       | 9         | 22,121,349                | CDKN2B-AS1   | T                   | 0.539               | 0.93        | 0.90        | 0.96        | 1.83E-06        | 0.74        | Yes        |       |                                  |
| rs12446552       | 16        | 11,720,066                | LITAF        | T                   | 0.723               | 0.92        | 0.89        | 0.95        | 3.05E-06        | 0.24        | Yes        |       |                                  |
| rs4853036        | 2         | 70,059,824                | GMCL1        | G                   | 0.736               | 0.92        | 0.89        | 0.95        | 6.43E-06        | 0.00        | Yes        |       |                                  |
| rs4789378        | 17        | 74,930,366                | MGAT5B       | C                   | 0.648               | 0.93        | 0.90        | 0.96        | 8.85E-06        | 0.51        | Yes        |       |                                  |
| rs2200650        | 11        | 7,326,195                 | SYT9         | G                   | 0.635               | 1.08        | 1.04        | 1.11        | 1.19E-05        | 0.00        | Yes        |       |                                  |

| Supplementary Table 2. Functional annotation of the region around rs3184504.                                                                                                                                                                                                                                                                                                                                                                                                                                                                                                                                                                                                                                                                                                                                            |                               |                                |          |                 |                              |                  |                 |           |            |                        |                                              |       |          |                |                                                     |                   |            |                                  |                             |  |
|-------------------------------------------------------------------------------------------------------------------------------------------------------------------------------------------------------------------------------------------------------------------------------------------------------------------------------------------------------------------------------------------------------------------------------------------------------------------------------------------------------------------------------------------------------------------------------------------------------------------------------------------------------------------------------------------------------------------------------------------------------------------------------------------------------------------------|-------------------------------|--------------------------------|----------|-----------------|------------------------------|------------------|-----------------|-----------|------------|------------------------|----------------------------------------------|-------|----------|----------------|-----------------------------------------------------|-------------------|------------|----------------------------------|-----------------------------|--|
| SNP                                                                                                                                                                                                                                                                                                                                                                                                                                                                                                                                                                                                                                                                                                                                                                                                                     | Position on chr 12 (build 37) | LD (r <sup>2</sup> ) rs3184504 | LD (D')  | Referece allele | Allele Frequency (Europeans) | RefSeq genes     | Location        | GERP cons | SiPhy cons | Promoter histone marks | Enhancer histone marks                       | DNase | Proteins | TCGA/Gtex eQTL | Motifs changed                                      | RegulomeD B Score | Phast Cons | ENCODE RNA-seq RegTFBS-clustered | FunSeq ENCODE annotation    |  |
| rs10774624                                                                                                                                                                                                                                                                                                                                                                                                                                                                                                                                                                                                                                                                                                                                                                                                              | 111,833,788                   | 0.81                           | 0.92     | G               | 0.53                         | 10kb 5' of SH2B3 | intergenic      |           |            |                        |                                              |       |          |                | Ets,Nr2f2                                           |                   |            |                                  |                             |  |
| rs7310615                                                                                                                                                                                                                                                                                                                                                                                                                                                                                                                                                                                                                                                                                                                                                                                                               | 111,865,049                   | 0.93                           | 0.98     | C               | 0.53                         | SH2B3            | intronic        |           |            |                        | GM12878, Huvec,                              |       |          |                | ERalpha-a                                           |                   |            |                                  |                             |  |
| <b>rs3184504</b>                                                                                                                                                                                                                                                                                                                                                                                                                                                                                                                                                                                                                                                                                                                                                                                                        | <b>111,884,608</b>            | <b>1</b>                       | <b>1</b> | <b>T</b>        | <b>0.53</b>                  | <b>SH2B3</b>     | <b>missense</b> |           |            |                        | <b>Huvec, GM12878</b>                        |       |          |                | <b>HES1,Mtf1</b>                                    | 3a                |            |                                  |                             |  |
| rs4766578                                                                                                                                                                                                                                                                                                                                                                                                                                                                                                                                                                                                                                                                                                                                                                                                               | 111,904,371                   | 0.9                            | 0.99     | T               | 0.51                         | ATXN2            | intronic        |           |            |                        | NHLF                                         |       |          |                | ERalpha-a,GATA,GCNF,LRH1,ROralpha1,RXRA,SF1         | 6                 |            |                                  |                             |  |
| rs10774625                                                                                                                                                                                                                                                                                                                                                                                                                                                                                                                                                                                                                                                                                                                                                                                                              | 111,910,219                   | 0.9                            | 0.98     | A               | 0.52                         | ATXN2            | intronic        |           |            |                        |                                              |       |          |                | Cdx,Foxf1,Foxi1,Foxj2,Foxl1,Foxo,Foxp1,Foxq1,Zfp105 | 5                 |            |                                  |                             |  |
| rs7137828                                                                                                                                                                                                                                                                                                                                                                                                                                                                                                                                                                                                                                                                                                                                                                                                               | 111,932,800                   | 0.87                           | 0.93     | C               | 0.53                         | ATXN2            | intronic        |           |            |                        | K562                                         |       |          |                | SP1                                                 | 5                 |            |                                  |                             |  |
| rs597808                                                                                                                                                                                                                                                                                                                                                                                                                                                                                                                                                                                                                                                                                                                                                                                                                | 111,973,358                   | 0.75                           | 0.92     | A               | 0.51                         | ATXN2            | intronic        |           |            |                        |                                              |       |          |                | BCL,ERalpha-a,Ets,Irf,SP1,ZBRK1,Znf143              |                   |            |                                  |                             |  |
| rs653178                                                                                                                                                                                                                                                                                                                                                                                                                                                                                                                                                                                                                                                                                                                                                                                                                | 112,007,756                   | 0.78                           | 0.89     | C               | 0.53                         | ATXN2            | intronic        |           |            | 8 organs               | NHLF, GM12878, HSMM, HMEC, K562, Huvec, NHEK |       |          |                | Esr2                                                | 5                 |            |                                  | Enhancer(2)                 |  |
| rs11065979                                                                                                                                                                                                                                                                                                                                                                                                                                                                                                                                                                                                                                                                                                                                                                                                              | 112,059,557                   | 0.61                           | -0.83    | C               | 0.44                         | 20kb 3' of BRAP  | intergenic      |           |            |                        |                                              |       |          |                | Myf                                                 | 5                 |            |                                  |                             |  |
| rs11065987                                                                                                                                                                                                                                                                                                                                                                                                                                                                                                                                                                                                                                                                                                                                                                                                              | 112,072,424                   | 0.51                           | -0.78    | A               | 0.42                         | 7.5kb 3' of BRAP | intergenic      |           |            |                        | K562                                         | K562  |          |                | Mrg1::Hoxa9                                         | 3a                |            |                                  | DHS, Enhancer(2)            |  |
| rs11065991                                                                                                                                                                                                                                                                                                                                                                                                                                                                                                                                                                                                                                                                                                                                                                                                              | 112,083,162                   | 0.5                            | -0.77    | C               | 0.42                         | BRAP             | intronic        |           |            |                        |                                              |       |          |                | Myc                                                 | 4                 |            |                                  | Enhancer, TFP(FOXA1, GATA3) |  |
| Gene-based location, distance from Refseq genes, LD, Phast cons, GERP, SiPhy scores from Haploreg and annovar. All SNPs with blank GERP scores map to a location that score <2 and so is regarded as not being evolutionarily conserved/potentially functional. All SNPs with blank Phastcons scores represent SNPs that do not map to within conserved regions. RegulomeDB score ( <a href="http://regulomedb.org/">http://regulomedb.org/</a> ) based on Known and predicted regulatory DNA elements from GEO, the ENCODE project, and published literature. Tissue-specific eQTL searches were made using Gtex. ( <a href="http://www.gtexportal.org/home/">http://www.gtexportal.org/home/</a> ) and TCGA data. FunSeq annotation using <a href="http://funseq.gersteinlab.org">http://funseq.gersteinlab.org</a> . |                               |                                |          |                 |                              |                  |                 |           |            |                        |                                              |       |          |                |                                                     |                   |            |                                  |                             |  |

**Supplementary Table 3. Association statistics of SNPs previously undiscovered by CRC or EC GWAS with strongest evidence of effects in opposite directions on CRC and EC predisposition.**

| SNP               | Chr       | Position (build 37) | Nearby gene  | Reference allele | Allele freq. | OR          | L95         | CI          | U95             | CI          | p-value    | $I^2$ | iCOGS EC samples included? |
|-------------------|-----------|---------------------|--------------|------------------|--------------|-------------|-------------|-------------|-----------------|-------------|------------|-------|----------------------------|
| rs2270539         | 1         | 78,047,628          | ZZZ3         | T                | 0.979        | 0.80        | 0.72        | 0.88        | 1.60E-05        | 0.00        | Yes        |       |                            |
| rs34462569        | 2         | 166,552,918         | CSRNP3       | G                | 0.934        | 1.22        | 1.12        | 1.33        | 3.75E-06        | 0.03        | No         |       |                            |
| rs10510663        | 3         | 35,559,240          | ARPP21       | T                | 0.948        | 0.86        | 0.80        | 0.92        | 2.28E-05        | 0.53        | Yes        |       |                            |
| rs1735546         | 3         | 128,075,398         | EEFSEC       | T                | 0.752        | 1.08        | 1.04        | 1.12        | 3.11E-05        | 0.29        | Yes        |       |                            |
| rs1852266         | 7         | 48,340,033          | ABCA13       | C                | 0.741        | 0.92        | 0.89        | 0.96        | 2.27E-05        | 0.00        | Yes        |       |                            |
| rs4727012         | 7         | 148,740,493         | EZH2         | C                | 0.891        | 1.18        | 1.10        | 1.26        | 9.64E-07        | 0.34        | No         |       |                            |
| rs112541862       | 9         | 97,483,158          | FBP1         | A                | 0.962        | 1.30        | 1.16        | 1.45        | 4.10E-06        | 0.03        | No         |       |                            |
| rs77922938        | 9         | 111,060,196         | KLF4         | G                | 0.953        | 0.85        | 0.79        | 0.91        | 8.33E-06        | 0.00        | Yes        |       |                            |
| rs606460          | 11        | 75,248,457          | GDPD5        | G                | 0.725        | 1.11        | 1.06        | 1.17        | 3.58E-06        | 0.29        | No         |       |                            |
| rs11607499        | 11        | 81,811,229          | PRCP         | T                | 0.954        | 1.27        | 1.15        | 1.40        | 1.75E-06        | 0.00        | No         |       |                            |
| rs997275          | 11        | 110,454,876         | ARHGAP20     | A                | 0.578        | 1.07        | 1.04        | 1.11        | 2.36E-05        | 0.00        | Yes        |       |                            |
| rs12817211        | 12        | 50,579,398          | LIMA1        | C                | 0.767        | 1.12        | 1.07        | 1.18        | 2.76E-06        | 0.50        | No         |       |                            |
| rs3117967         | 13        | 22,508,254          | FGF9         | G                | 0.896        | 0.89        | 0.85        | 0.94        | 1.33E-05        | 0.17        | Yes        |       |                            |
| rs9592895         | 13        | 73,813,982          | KLF5         | T                | 0.655        | 1.08        | 1.04        | 1.11        | 1.42E-05        | 0.39        | Yes        |       |                            |
| rs1952157         | 14        | 34,289,438          | NPAS3        | C                | 0.690        | 1.08        | 1.05        | 1.12        | 6.26E-06        | 0.52        | Yes        |       |                            |
| rs3001371         | 14        | 105,242,831         | AKT1         | C                | 0.691        | 0.93        | 0.90        | 0.96        | 1.29E-05        | 0.30        | Yes        |       |                            |
| rs11150038        | 16        | 78,076,559          | CLEC3A       | G                | 0.944        | 1.27        | 1.15        | 1.39        | 9.89E-07        | 0.00        | No         |       |                            |
| rs76525880        | 17        | 46,614,250          | HOXB1        | A                | 0.929        | 1.16        | 1.09        | 1.24        | 6.68E-06        | 0.58        | Yes        |       |                            |
| <b>rs12970291</b> | <b>18</b> | <b>73,011,336</b>   | <b>TSHZ1</b> | <b>T</b>         | <b>0.965</b> | <b>1.27</b> | <b>1.16</b> | <b>1.38</b> | <b>4.82E-08</b> | <b>0.00</b> | <b>Yes</b> |       |                            |
| rs4816890         | 21        | 24,420,502          | NCAM2        | T                | 0.637        | 0.90        | 0.86        | 0.94        | 2.13E-06        | 0.24        | No         |       |                            |

Supplementary Table 4. Functional annotation of the region around rs12970291.

| SNP               | Position on chr 18 (build 37)   | LD (r <sup>2</sup> ) rs12970291 | LD (D')  | RefGene allele | Allele Frequency (Europeans) | RefSeq genes | Location          | GERP cons | SiPhy cons | Promoter histone marks | Enhancer histone marks       | DNase | Proteins | TCGA/ Gtex eQTL | Motifs changed           | RegulomeD B Score | Phast Cons        | ENCODE RNA-seq RegTFBS-clustered | FunSeq ENCODE annotation |
|-------------------|---------------------------------|---------------------------------|----------|----------------|------------------------------|--------------|-------------------|-----------|------------|------------------------|------------------------------|-------|----------|-----------------|--------------------------|-------------------|-------------------|----------------------------------|--------------------------|
| rs12969532        | 72,984,262                      | 0.52                            | 0.74     | C              | 0.03                         | TSHZ1        | intronic          |           |            |                        |                              |       |          |                 | Arnt,BHLHE40,GR          | 5                 |                   |                                  |                          |
| rs71359079        | 72,984,455                      | 0.5                             | 0.71     | C              | 0.03                         | TSHZ1        | intronic          |           |            |                        |                              |       |          |                 | 6 altered motifs         | 6                 |                   |                                  |                          |
| rs12965321        | 72,986,176                      | 0.59                            | 0.83     | G              | 0.02                         | TSHZ1        | intronic          |           |            |                        |                              |       |          |                 | Hand1,Nanog,Sox2, Zbtb12 | 5                 | Score 452, lod 38 |                                  |                          |
| rs34981053        | 72,989,467                      | 0.59                            | 0.83     | T              | 0.02                         | TSHZ1        | intronic          |           |            | Huvec, HSM             | 35 cell types                |       |          |                 | HNF4A,NRSF,SP1           | 5                 |                   |                                  | DHS, TFP(ZNF263)         |
| rs28420499        | 72,989,742                      | 0.5                             | 0.71     | G              | 0.03                         | TSHZ1        | intronic          |           |            | Huvec, HSM             | 5 cell types                 |       |          |                 | 7 altered motifs         | 5                 |                   |                                  | DHS, TFP(ZNF263)         |
| rs77026922        | 72,991,038                      | 0.68                            | 0.85     | T              | 0.03                         | TSHZ1        | intronic          |           |            |                        | 7 cell types                 |       |          |                 | 13 altered motifs        | 5                 |                   |                                  | DHS                      |
| rs56280961        | 72,991,193                      | 0.4                             | 0.78     | C              | 0.02                         | TSHZ1        | intronic          |           |            |                        | Medullo                      |       |          |                 | Pax-5,Pax-6              | 5                 |                   |                                  | DHS                      |
| rs34551261        | 72,991,577                      | 0.68                            | 0.85     | G              | 0.03                         | TSHZ1        | intronic          |           |            |                        | 6 cell types                 |       | ZNF263   |                 | 8 altered motifs         | 4                 |                   | ZNF263                           | DHS, TFP(ZNF263)         |
| rs36046989        | 72,996,430                      | 0.73                            | 0.85     | C              | 0.03                         | TSHZ1        | intronic          |           |            |                        | ProgFib                      |       |          |                 | Foxa,Hsf,LXR,RXRA        | 4                 |                   |                                  |                          |
| rs33930274        | 72,998,899                      | 0.77                            | 0.9      | G              | 0.03                         | TSHZ1        | missense          |           |            |                        | HMEC,GM12891,GM19239,Medullo |       |          |                 | Pou2f2                   | 5                 |                   |                                  |                          |
| rs34242916        | 73,003,598                      | 0.73                            | 0.85     | T              | 0.03                         | TSHZ1        | intergenic        |           |            | HepG2                  | HepG2                        |       |          |                 | NRSF                     | 5                 |                   |                                  | DHS                      |
| rs34704942        | 73,003,694                      | 0.73                            | 0.85     | C              | 0.03                         | TSHZ1        | intergenic        |           |            |                        | LNCaP,Th1,ProgFib,iPS        |       |          |                 | 5 altered motifs         | 5                 |                   |                                  | DHS                      |
| rs12969489        | 73,008,360                      | 0.81                            | 0.95     | C              | 0.03                         | TSHZ1        | intergenic        |           |            |                        |                              |       |          |                 | 5 altered motifs         |                   |                   |                                  |                          |
| rs9946654         | 73,011,336                      | 0.81                            | 0.95     | T              | 0.03                         | TSHZ1        | intergenic        |           |            |                        |                              |       |          |                 | BRCA1,Foxp1,Nkx2         |                   |                   |                                  |                          |
| rs36104458        | 73,012,489                      | 0.81                            | 0.95     | A              | 0.03                         | TSHZ1        | intergenic        |           |            |                        | CLL                          |       |          |                 | Gfi1                     | 5                 |                   |                                  | DHS                      |
| rs12962160        | 73,013,181                      | 0.81                            | 0.95     | A              | 0.03                         | TSHZ1        | intergenic        |           |            |                        |                              |       |          |                 | HNF1,PLZF                |                   |                   |                                  |                          |
| rs34227877        | 73,013,811                      | 0.57                            | 0.93     | A              | 0.02                         | TSHZ1        | intergenic        |           |            |                        | Fibrobl                      |       |          |                 | LBP-1,Pax-6,ZBTB7A       | 5                 |                   |                                  | DHS                      |
| rs17056795        | 73,016,067                      | 0.69                            | 1        | G              | 0.04                         | TSHZ1        | intergenic        |           |            |                        | Fibrobl                      |       |          |                 | BCLNF-kappaB,ZBTB33      | 5                 |                   |                                  | DHS                      |
| <b>rs12970291</b> | 73,017,234                      | <b>1</b>                        | <b>1</b> | <b>G</b>       | <b>0.03</b>                  | <b>TSHZ1</b> | <b>intergenic</b> |           |            |                        |                              |       |          |                 | <b>9 altered motifs</b>  | <b>5</b>          |                   |                                  |                          |
| rs12968532        | 73,020,946                      | 1                               | 1        | C              | 0.03                         | TSHZ1        | intergenic        |           |            |                        |                              |       |          |                 | Hoxd10,LRH1,Mef2,Pax-1   |                   |                   |                                  |                          |
| rs35969565        | 73,022,413                      | 1                               | 1        | C              | 0.03                         | TSHZ1        | intergenic        |           |            |                        |                              |       |          |                 | GLI                      |                   |                   |                                  |                          |
| rs12959779        | 73,023,486                      | 1                               | 1        | G              | 0.03                         | TSHZ1        | intergenic        |           |            |                        | Medullo,Osteobl              |       |          |                 | 9 altered motifs         | 5                 |                   |                                  | DHS                      |
| rs12965434        | 73,024,810                      | 1                               | 1        | G              | 0.03                         | TSHZ1        | intergenic        |           |            |                        |                              |       |          |                 |                          |                   |                   |                                  |                          |
| rs12961817        | 73,024,904                      | 1                               | 1        | C              | 0.03                         | TSHZ1        | intergenic        |           |            |                        | Melano                       |       |          |                 | EWSR1-Fli1,Ets,GATA,TATA | 5                 |                   |                                  | DHS                      |
| rs78784067        | 73,025,962                      | 0.91                            | 1        | C              | 0.03                         | TSHZ1        | intergenic        |           |            |                        |                              |       |          |                 | Hmx,Sox                  | 5                 |                   |                                  |                          |
| rs2581665         | 73,030,498                      | 1                               | -1       | C              | 0.97                         | TSHZ1        | intergenic        |           |            |                        |                              |       |          |                 | BCL,NRSF,SP1             | 5                 |                   |                                  |                          |
| rs12955930        | 73,030,682                      | 1                               | 1        | C              | 0.03                         | TSHZ1        | intergenic        |           |            |                        |                              |       |          |                 | HDAC2,Pax-6,Pax-8        | 5                 |                   |                                  |                          |
| rs35185115        | 73,032,159                      | 1                               | 1        | A              | 0.03                         | TSHZ1        | intergenic        |           |            |                        | PanIslets                    |       |          |                 | Foxp3,Mef2               | 5                 |                   |                                  | TFP(PAX5)                |
| rs34521731        | 73,032,447                      | 0.91                            | 1        | TC             | 0.03                         | TSHZ1        | intergenic        |           |            |                        | Th1,FibroP,Medullo           |       |          |                 | 11 altered motifs        |                   |                   |                                  |                          |
| rs12969979        | 73,032,676                      | 1                               | 1        | G              | 0.03                         | TSHZ1        | intergenic        |           |            |                        | LNCaP                        |       |          |                 | YY1                      | 5                 |                   |                                  |                          |
| rs12966313        | 73,032,803                      | 1                               | 1        | C              | 0.03                         | TSHZ1        | intergenic        |           |            |                        |                              |       |          |                 | Nrf-2,TCF11::MafG,ZID    | 6                 |                   |                                  |                          |
| rs12956172        | 73,033,299                      | 1                               | 1        | A              | 0.03                         | TSHZ1        | intergenic        |           |            |                        | LNCaP,Fibrobl,Osteobl        |       |          |                 | Ik-1,Ik-2,ZEB1           | 2b                | Score 358, lod 38 |                                  | DHS                      |
| rs12959858        | 73,034,322                      | 1                               | 1        | G              | 0.03                         | TSHZ1        | intergenic        |           |            |                        | FibroP,PanIslets             |       |          |                 | CACD,EBF,Irf             | 5                 |                   |                                  |                          |
| rs35181847        | 73,037,586                      | 1                               | 1        | C              | 0.03                         | TSHZ1        | intergenic        |           |            |                        |                              |       |          |                 | 7 altered motifs         |                   |                   |                                  |                          |
| rs12963413        | 73,039,236                      | 1                               | 1        | C              | 0.03                         | TSHZ1        | intergenic        |           |            |                        |                              |       |          |                 | 7 altered motifs         | 6                 |                   |                                  |                          |
| rs4453592         | 73,040,883                      | 0.85                            | 1        | T              | 0.02                         | TSHZ1        | intergenic        |           |            |                        |                              |       |          |                 | Rad21,Znf143,p300        |                   |                   |                                  |                          |
| rs34468146        | 73,047,740                      | 0.95                            | 1        | T              | 0.03                         | TSHZ1        | intergenic        |           |            |                        | Osteobl                      |       |          |                 | Gm397,Mtf1               | 5                 |                   |                                  | DHS, TFP(SRF)            |
| rs71359085        | 73,048,182                      | 0.95                            | 1        | G              | 0.03                         | TSHZ1        | intergenic        |           |            |                        | Medullo                      |       |          |                 | 5 altered motifs         | 5                 |                   |                                  | DHS                      |
| rs34240979        | 73,052,310                      | 0.95                            | 1        | C              | 0.03                         | TSHZ1        | intergenic        |           |            |                        |                              |       |          |                 | 12 altered motifs        | 5                 |                   |                                  |                          |
| rs12953745        | 73,053,195                      | 0.66                            | 1        | C              | 0.02                         | TSHZ1        | intergenic        |           |            |                        | Th1,Medullo                  |       |          |                 | Irf,SIX5                 | 5                 |                   |                                  | DHS                      |
| rs71359086        | 73,053,690                      | 0.95                            | 1        | C              | 0.03                         | TSHZ1        | intergenic        |           |            |                        |                              |       |          |                 | 5 altered motifs         | 5                 |                   |                                  |                          |
| rs12956810        | 73,058,905                      | 0.95                            | 1        | C              | 0.03                         | TSHZ1        | intergenic        |           |            |                        | H1-hESC                      |       |          |                 | RXRA                     | 5                 |                   |                                  |                          |
|                   | Annotation as in Supp. Table 2. |                                 |          |                |                              |              |                   |           |            |                        |                              |       |          |                 |                          |                   |                   |                                  |                          |

Supplementary Table 5. Tests for excess sharing of potential predisposition SNPs by CRC and EC cases at various statistical thresholds

|                   |                      | Endometrial Cancer   |        |                      |        |                      |        |                      |  |        |  |        |  |
|-------------------|----------------------|----------------------|--------|----------------------|--------|----------------------|--------|----------------------|--|--------|--|--------|--|
|                   |                      | P<1x10 <sup>-3</sup> |        | P≥1x10 <sup>-3</sup> |        | P<1x10 <sup>-2</sup> |        | P≥1x10 <sup>-2</sup> |  | P<0.05 |  | P≥0.05 |  |
| Colorectal Cancer | P<1x10 <sup>-3</sup> | 1                    | 435    | 8                    | 428    | 38                   | 398    |                      |  |        |  |        |  |
|                   | P≥1x10 <sup>-3</sup> | 420                  | 246040 | 3361                 | 243099 | 14957                | 231503 |                      |  |        |  |        |  |
|                   |                      | P=0.766              |        | P=0.397              |        | P=0.0208             |        |                      |  |        |  |        |  |
|                   | P<1x10 <sup>-2</sup> | 7                    | 3346   | 50                   | 3319   | 224                  | 3129   |                      |  |        |  |        |  |
|                   | P≥1x10 <sup>-2</sup> | 414                  | 243129 | 3303                 | 240224 | 14771                | 228772 |                      |  |        |  |        |  |
|                   |                      | P=0.589              |        | P=0.524              |        | P=0.138              |        |                      |  |        |  |        |  |
|                   | P<0.05               | 24                   | 14448  | 193                  | 14279  | 913                  | 13559  |                      |  |        |  |        |  |
|                   | P≥0.05               | 397                  | 232027 | 3176                 | 229248 | 14082                | 218342 |                      |  |        |  |        |  |
|                   |                      | P=0.888              |        | P=0.524              |        | P=0.222              |        |                      |  |        |  |        |  |

\*χ<sup>2</sup> tests in genome-wide enrichment using 246,896 SNP with r<sup>2</sup><0.1

No SNPs had p-values of less than 10<sup>-4</sup> for both CRC and EC

**Supplementary Figure I. Association plots of *TSHZ1* region by CRC, EC and combined**

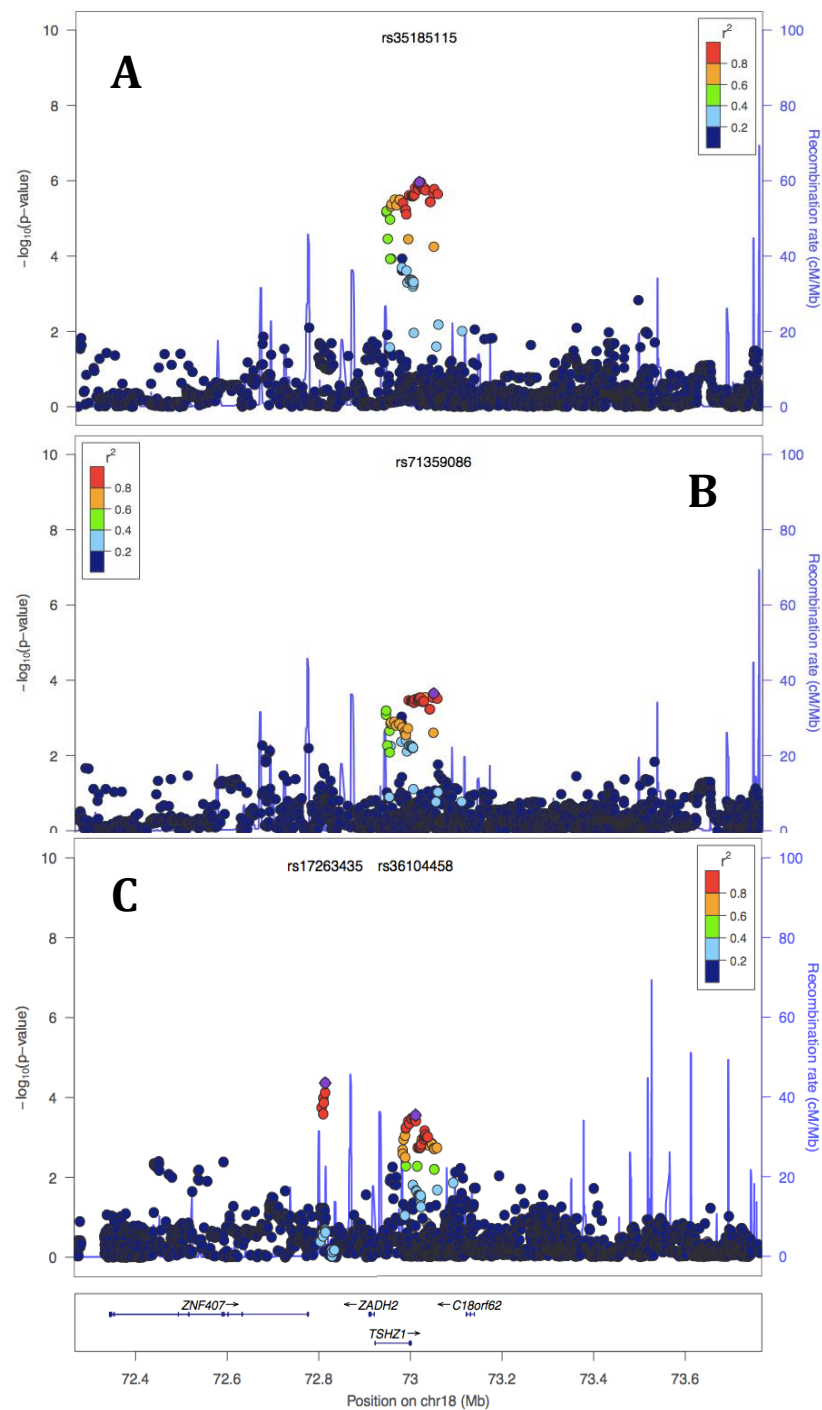

Regional association plots of *TSHZ1* region using **A** CRC and EC GWAS **B** CRC GWAS **C** EC GWAS. rs12970291 ( $P_{\text{CRC/ECmeta}}=4.82 \times 10^{-8}$ , top SNP typed in iCOGS for CRC and ERC analysis), rs35185115 ( $P_{\text{CRC/ECmeta}}=1.08 \times 10^{-6}$ , top SNP typed or well-imputed in EC and CRC GWAS), rs71359086 ( $P_{\text{CRC}}=2.24 \times 10^{-4}$ , top SNP in CRC GWAS), rs36104458 ( $P_{\text{EC}}=4.35 \times 10^{-5}$ , top SNP in EC GWAS) all lie between 10.5 - 51.8kb downstream of *TSHZ1*, and are in perfect LD ( $r^2=1$ ). The similarity of these three plots suggests that there may be a single causal variant downstream of *TSHZ1* present in EC and CRC acting in opposite directions. An additional peak, rs17263435 ( $P=4.35 \times 10^{-5}$ ) is observed in the EC GWAS, but is not significant in CRC ( $P=0.10$ ). rs17263435 is not typed on iCOGS and has a CRC and EC meta-analysis p-value of  $2.21 \times 10^{-4}$ .

**Supplementary Figure 2. LD and haplotype structure at TERT-CLPTMIL locus**

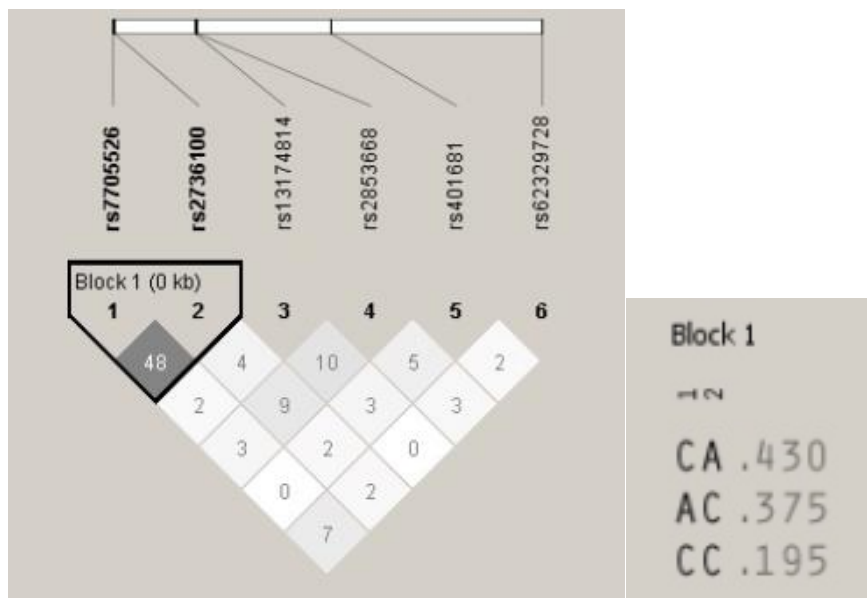

Plots were produced using HaploView for NSECG samples, showing pairwise LD ( $r^2$ ) with standard colouring, left, and predicted haplotypes, right. SNPs were selected on the basis of reported associations from the literature with EC and/or CRC risk, albeit not a genome-wide levels of significance. rs2736100 was associated with CRC (Kinnersley, 2012). rs401681 (Rafnar, 2009) and rs2853668 (Peters, 2009) have also been shown to be associated with CRC in previous studies of smaller scale. rs7705526, rs13174814 and rs62329728 have been recently associated with EC (Carvajal-Carmona 2014).
